# Supplementary material for: Double complex salts based on tetraamminplatinum(ii) and vanadyl(iv) bisoxalate for the preparation of bimetallic Pt–V alloys
Source: Royal Society of Chemistry journal article supplement (doi:10.1039/d4nj03084b), 2024-01-01
Supplement: d4nj03084b1.pdf [file d4nj03084b1.pdf]

*Electronic Supporting Information*

## **Double complex salts based on tetraamminplatinum(II) and vanadyl(IV) bisoxalate for the preparation of bimetallic Pt-V alloy**

Sofia N. Vorobyeva,<sup>\*a</sup> Zakhar V. Rudzis,<sup>a,b</sup> Taisiya S. Sukhikh,<sup>a</sup> Evgeny Yu. Filatov,<sup>a</sup> Pavel E. Plusnin,<sup>a</sup> Vladimir A. Nadolnny,<sup>a</sup> Artem S. Bogomyakov,<sup>c</sup> and Sergey V. Korenev<sup>a</sup>

---

<sup>a.</sup> *Nikolaev Institute of Inorganic Chemistry, Siberian Branch of Russian Academy of Sciences, 3, Acad. Lavrentiev Ave., Novosibirsk 630090, Russia. E-mail: [vorobyeva@niic.nsc.ru](mailto:vorobyeva@niic.nsc.ru)(Sofiya N. Vorobyeva)*

<sup>b.</sup> *Novosibirsk State University, 1, Pirogova str., Novosibirsk 630090, Russia .*

<sup>c.</sup> *International Tomography Center, SB RAS, Institutskaya str., 3a, Novosibirsk, Russian Federation.*

## Table of Contents

|                 |    |
|-----------------|----|
| Table S1.....   | 6  |
| Figure S1.....  | 7  |
| Figure S2.....  | 7  |
| Figure S3.....  | 7  |
| Figure S4.....  | 8  |
| Figure S5.....  | 8  |
| Figure S6.....  | 8  |
| Figure S7.....  | 9  |
| Figure S8.....  | 9  |
| Figure S9.....  | 9  |
| Figure S10..... | 10 |
| Figure S11..... | 10 |
| Figure S12..... | 10 |
| IR spectra..... | 11 |
| Figure S13..... | 11 |
| Figure S14..... | 11 |
| Figure S15..... | 12 |
| Figure S16..... | 12 |
| Figure S17..... | 13 |
| Figure S18..... | 13 |
| Figure S19..... | 14 |
| Figure S20..... | 14 |
| Figure S21..... | 15 |
| Figure S22..... | 15 |
| EPR.....        | 16 |
| Figure S23..... | 16 |
| TG.....         | 17 |
| Figure S24..... | 17 |
| Figure S25..... | 18 |
| Figure S26..... | 19 |
| Figure S27..... | 20 |
| Figure S28..... | 21 |
| Figure S29..... | 22 |

Table S1. Crystal data and structure refinement for **(Bu<sub>4</sub>N)<sub>2</sub>[VO(C<sub>2</sub>O<sub>4</sub>)<sub>2</sub>] (I)**, **{(Bu<sub>4</sub>N)(VO<sub>2</sub>(C<sub>2</sub>O<sub>4</sub>))<sub>n</sub> (II)}**, **[Pt(NH<sub>3</sub>)<sub>4</sub>][VO(H<sub>2</sub>O)(C<sub>2</sub>O<sub>4</sub>)<sub>2</sub>]·2H<sub>2</sub>O (III)** and **{[Pt(NH<sub>3</sub>)<sub>4</sub>][VO(C<sub>2</sub>O<sub>4</sub>)<sub>2</sub>]}<sub>n</sub> (IV)**.

| Complex                                              | <b>(Bu<sub>4</sub>N)<sub>2</sub>[VO(C<sub>2</sub>O<sub>4</sub>)<sub>2</sub>] (I)</b> | <b>{(Bu<sub>4</sub>N)(VO<sub>2</sub>(C<sub>2</sub>O<sub>4</sub>))<sub>n</sub> (II)}</b> | <b>[Pt(NH<sub>3</sub>)<sub>4</sub>][VO(H<sub>2</sub>O)(C<sub>2</sub>O<sub>4</sub>)<sub>2</sub>]·2H<sub>2</sub>O (III)</b> | <b>{[Pt(NH<sub>3</sub>)<sub>4</sub>][VO(C<sub>2</sub>O<sub>4</sub>)<sub>2</sub>]}<sub>n</sub> (IV)</b> |
|------------------------------------------------------|--------------------------------------------------------------------------------------|-----------------------------------------------------------------------------------------|---------------------------------------------------------------------------------------------------------------------------|--------------------------------------------------------------------------------------------------------|
| Empirical formula                                    | C <sub>36</sub> H <sub>72</sub> N <sub>2</sub> O <sub>9</sub> V                      | C <sub>18</sub> H <sub>36</sub> NO <sub>6</sub> V                                       | C <sub>4</sub> H <sub>18</sub> N <sub>4</sub> O <sub>12</sub> PtV                                                         | C <sub>4</sub> H <sub>12</sub> N <sub>4</sub> O <sub>9</sub> PtV                                       |
| Formula weight                                       | 727.89                                                                               | 413.42                                                                                  | 560.25                                                                                                                    | 506.21                                                                                                 |
| Crystal system                                       | monoclinic                                                                           | monoclinic                                                                              | triclinic                                                                                                                 | monoclinic                                                                                             |
| Space group, Z                                       | C2/c, 4                                                                              | P2 <sub>1</sub> /n, 4                                                                   | P-1, 2                                                                                                                    | C2/c, 8                                                                                                |
| <i>a</i> (Å)                                         | 18.9092(19)                                                                          | 8.8694(5)                                                                               | 7.27950(10)                                                                                                               | 19.603(8)                                                                                              |
| <i>b</i> (Å)                                         | 13.9416(12)                                                                          | 14.9160(6)                                                                              | 8.24340(10)                                                                                                               | 7.945(3)                                                                                               |
| <i>c</i> (Å)                                         | 18.272(3)                                                                            | 16.6499(7)                                                                              | 12.9863(2)                                                                                                                | 15.358(6)                                                                                              |
| <i>α</i> /°                                          | 90                                                                                   | 90                                                                                      | 108.1350(10)                                                                                                              | 90                                                                                                     |
| <i>β</i> /°                                          | 120.899(3)                                                                           | 103.309(2)                                                                              | 97.3040(10)                                                                                                               | 97.242(13)                                                                                             |
| <i>γ</i> /°                                          | 90                                                                                   | 90                                                                                      | 95.7430(10)                                                                                                               | 90                                                                                                     |
| <i>V</i> (Å <sup>3</sup> )                           | 4133.4(8)                                                                            | 2143.56(17)                                                                             | 726.455(18)                                                                                                               | 2372.8(16)                                                                                             |
| <i>d</i> Calc(g/cm <sup>3</sup> )                    | 1.170                                                                                | 1.281                                                                                   | 2.561                                                                                                                     | 2.834                                                                                                  |
| <i>μ</i> /mm <sup>-1</sup>                           | 0.289                                                                                | 0.493                                                                                   | 10.331                                                                                                                    | 12.618                                                                                                 |
| <i>F</i> (000)                                       | 1588.0                                                                               | 888.0                                                                                   | 534.0                                                                                                                     | 1896.0                                                                                                 |
| Crystal size (mm)                                    | 0.09 × 0.09 × 0.07                                                                   | 0.09 × 0.06 × 0.05                                                                      | 0.1 × 0.09 × 0.04                                                                                                         | 0.05 × 0.03 × 0.01                                                                                     |
| 2 $\theta$ range for data collection/°               | 5.022– 56.558                                                                        | 4.81-54.978                                                                             | 3.348 - 66.264                                                                                                            | 5.348-46.522                                                                                           |
| Index ranges                                         | -25 ≤ <i>h</i> ≤ 2<br>-18 ≤ <i>k</i> ≤ 18<br>-24 ≤ <i>l</i> ≤ 23                     | -11 ≤ <i>h</i> ≤ 11<br>-19 ≤ <i>k</i> ≤ 19<br>-20 ≤ <i>l</i> ≤ 21                       | -10 ≤ <i>h</i> ≤ 11<br>-12 ≤ <i>k</i> ≤ 12<br>-19 ≤ <i>l</i> ≤ 19                                                         | -21 ≤ <i>h</i> ≤ 21<br>-8 ≤ <i>k</i> ≤ 8<br>-17 ≤ <i>l</i> ≤ 10                                        |
| Reflections collected                                | 25901                                                                                | 23280                                                                                   | 15497                                                                                                                     | 4516                                                                                                   |
| Independent reflections ( <i>R</i> <sub>int</sub> )  | 5125 [ <i>R</i> <sub>int</sub> = 0.0738, <i>R</i> <sub>sigma</sub> = 0.0543]         | 4914 [ <i>R</i> <sub>int</sub> = 0.0771, <i>R</i> <sub>sigma</sub> = 0.0698]            | 5492 [ <i>R</i> <sub>int</sub> = 0.0258, <i>R</i> <sub>sigma</sub> = 0.0279]                                              | 1703 [ <i>R</i> <sub>int</sub> = 0.1196, <i>R</i> <sub>sigma</sub> = 0.1500]                           |
| Completeness to theta = 50.5°                        | 99.9 %                                                                               | 99.8 %                                                                                  | 100 %                                                                                                                     | 99.8 %                                                                                                 |
| Data / restraints / parameters                       | 5125/0/222                                                                           | 4914/0/239                                                                              | 5492/0/213                                                                                                                | 1703/78/179                                                                                            |
| Goodness-of-fit on <i>F</i> <sup>2</sup>             | 1.040                                                                                | 1.035                                                                                   | 1.065                                                                                                                     | 0.950                                                                                                  |
| Final <i>R</i> indices ( <i>I</i> ≥ 2σ ( <i>I</i> )) | <i>R</i> <sub>1</sub> = 0.0449, <i>wR</i> <sub>2</sub> = 0.1022                      | <i>R</i> <sub>1</sub> = 0.0473, <i>wR</i> <sub>2</sub> = 0.0951                         | <i>R</i> <sub>1</sub> = 0.0192, <i>wR</i> <sub>2</sub> = 0.0414                                                           | <i>R</i> <sub>1</sub> = 0.0561, <i>wR</i> <sub>2</sub> = 0.0987                                        |
| <i>R</i> indices (all data)                          | <i>R</i> <sub>1</sub> = 0.0648, <i>wR</i> <sub>2</sub> = 0.1157                      | <i>R</i> <sub>1</sub> = 0.0729, <i>wR</i> <sub>2</sub> = 0.1098                         | <i>R</i> <sub>1</sub> = 0.0252, <i>wR</i> <sub>2</sub> = 0.0433                                                           | <i>R</i> <sub>1</sub> = 0.0996, <i>wR</i> <sub>2</sub> = 0.1190                                        |
| Largest diff. peak and hole (e/Å <sup>3</sup> )      | 0.41/-0.32                                                                           | 0.32/-0.33                                                                              | 0.61/-1.58                                                                                                                | 1.33/-1.55                                                                                             |

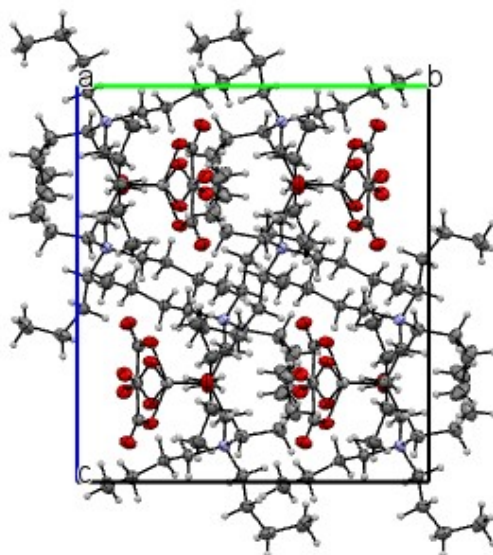

Figure S1. Packing of  $(\text{Bu}_4\text{N})_2[\text{VO}(\text{C}_2\text{O}_4)_2]$  (**I**) (view along the  $a$  axis).

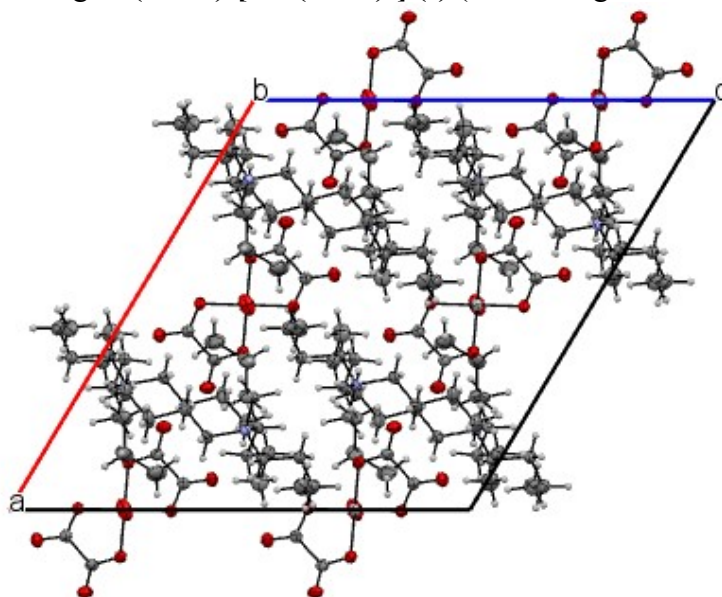

Figure S2. Packing of  $(\text{Bu}_4\text{N})_2[\text{VO}(\text{C}_2\text{O}_4)_2]$  (**I**) (view along the  $b$  axis).

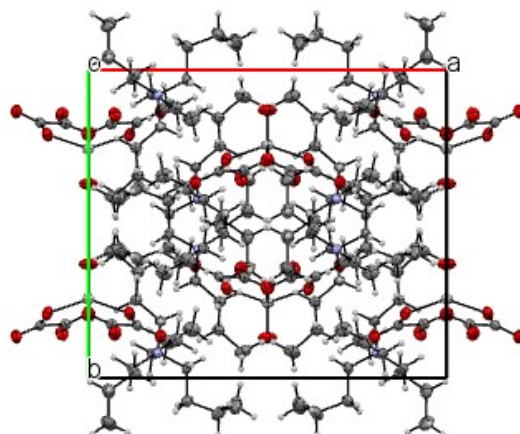

Figure S3. Packing of  $(\text{Bu}_4\text{N})_2[\text{VO}(\text{C}_2\text{O}_4)_2]$  (**I**) (view along the  $c$  axis).

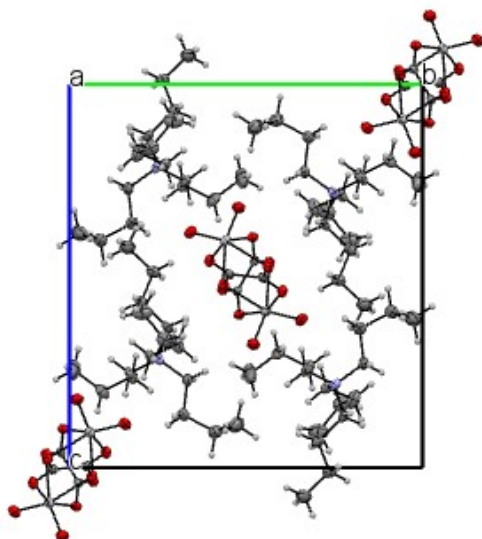

Figure S4. Packing of  $\{(\text{Bu}_4\text{N})(\text{VO}_2(\text{C}_2\text{O}_4))\}_n$  (II) (view along the *a* axis).

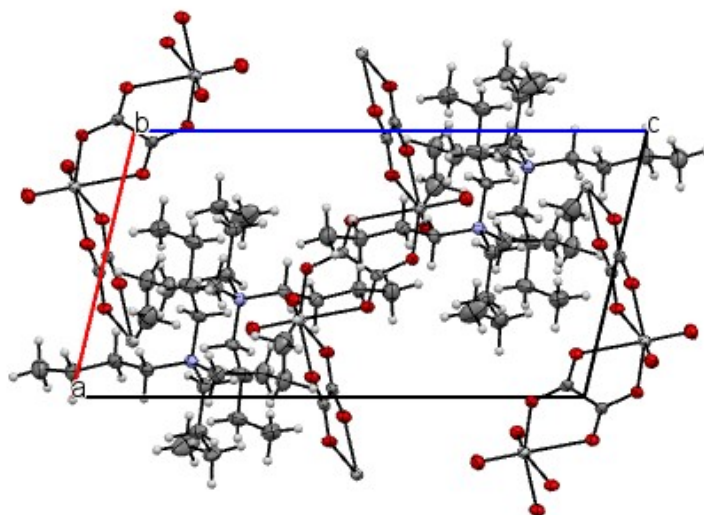

Figure S5. Packing of  $\{(\text{Bu}_4\text{N})(\text{VO}_2(\text{C}_2\text{O}_4))\}_n$  (II) (view along the *b* axis).

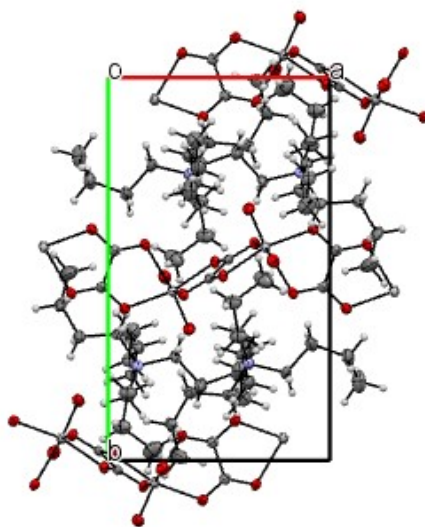

Figure S6. Packing of  $\{(\text{Bu}_4\text{N})(\text{VO}_2(\text{C}_2\text{O}_4))\}_n$  (II) (view along the *c* axis).

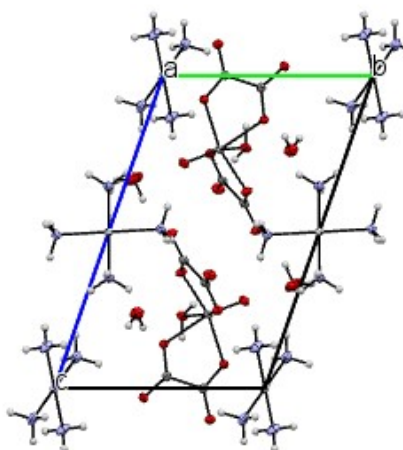

Figure S7. Packing of  $[\text{Pt}(\text{NH}_3)_4][\text{VO}(\text{H}_2\text{O})(\text{C}_2\text{O}_4)_2]\cdot 2\text{H}_2\text{O}$  (III) (view along the  $a$  axis).

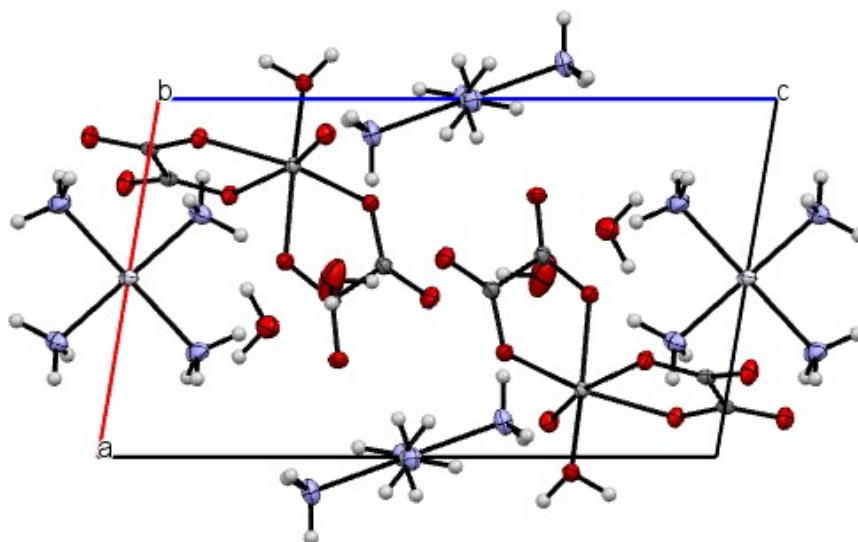

Figure S8. Packing of  $[\text{Pt}(\text{NH}_3)_4][\text{VO}(\text{H}_2\text{O})(\text{C}_2\text{O}_4)_2]\cdot 2\text{H}_2\text{O}$  (III) (view along the  $b$  axis).

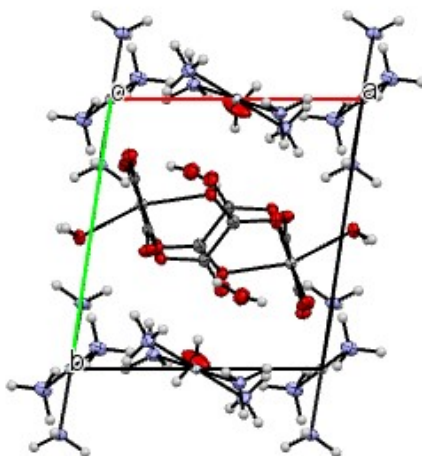

Figure S9. Packing of  $[\text{Pt}(\text{NH}_3)_4][\text{VO}(\text{H}_2\text{O})(\text{C}_2\text{O}_4)_2]\cdot 2\text{H}_2\text{O}$  (III) (view along the  $c$  axis).

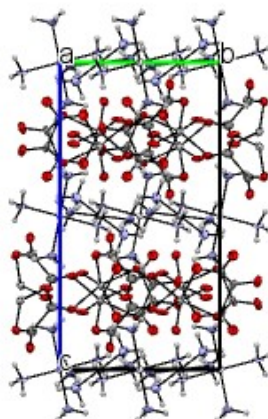

Figure S10. Packing of  $\{[\text{Pt}(\text{NH}_3)_4][\text{VO}(\text{C}_2\text{O}_4)_2]\}_n$  (IV) (view along the  $a$  axis).

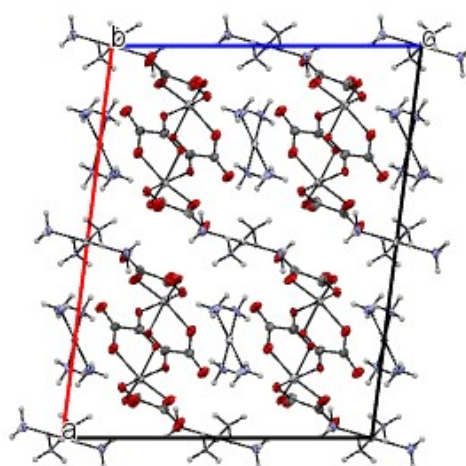

Figure S11. Packing of  $\{[\text{Pt}(\text{NH}_3)_4][\text{VO}(\text{C}_2\text{O}_4)_2]\}_n$  (IV) (view along the  $b$  axis).

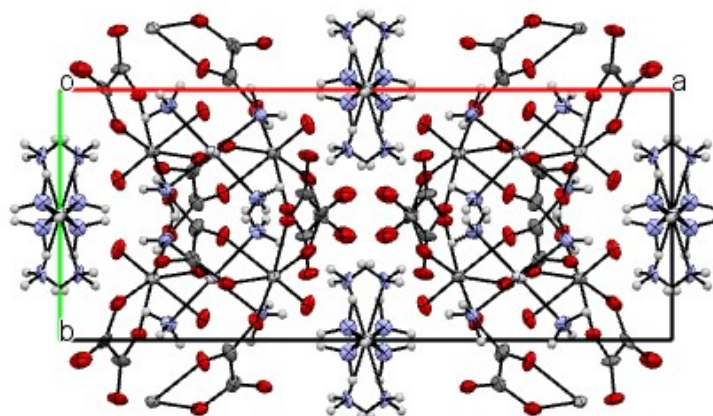

Figure S12. Packing of  $\{[\text{Pt}(\text{NH}_3)_4][\text{VO}(\text{C}_2\text{O}_4)_2]\}_n$  (IV) (view along the  $c$  axis).

IR spectra

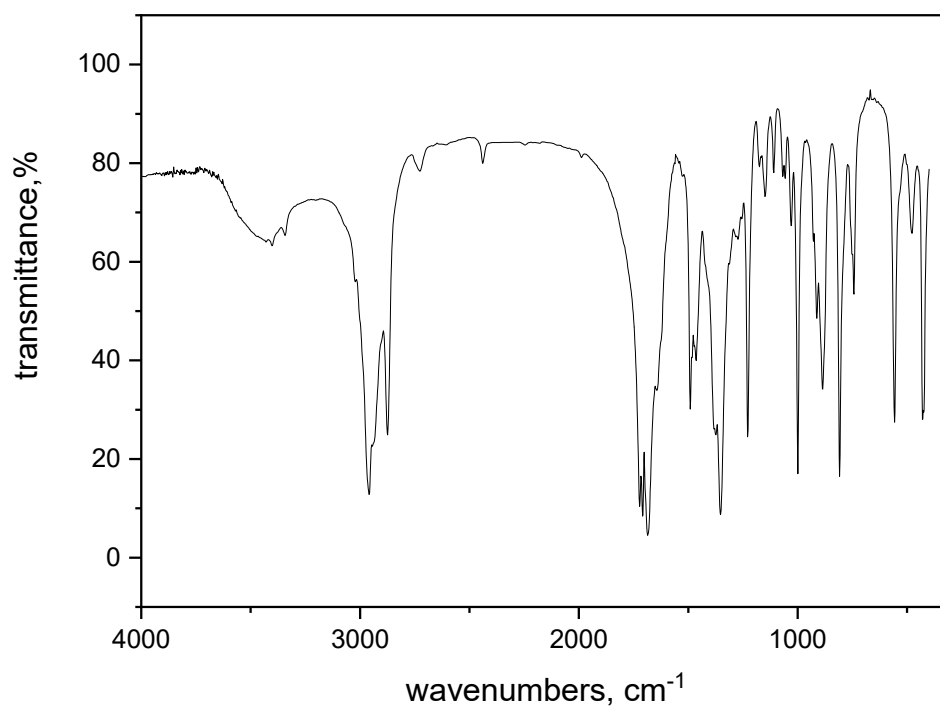

Figure S13. IR spectrum of  $(\text{Bu}_4\text{N})_2[\text{VO}(\text{C}_2\text{O}_4)_2]$  (I).

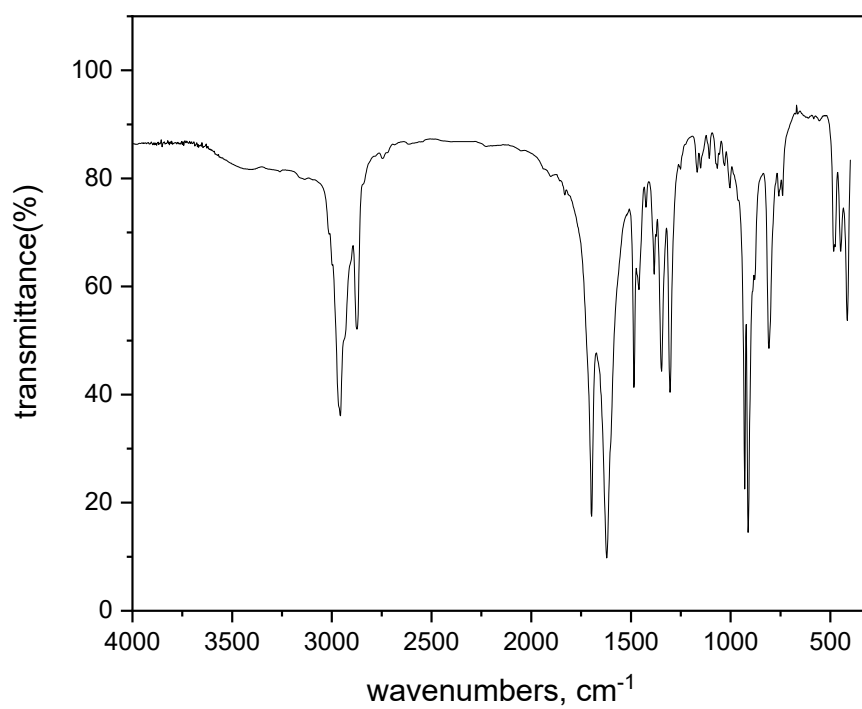

Figure S14. IR spectrum of  $\{(\text{Bu}_4\text{N})(\text{VO}_2(\text{C}_2\text{O}_4))\}_n$  (II).



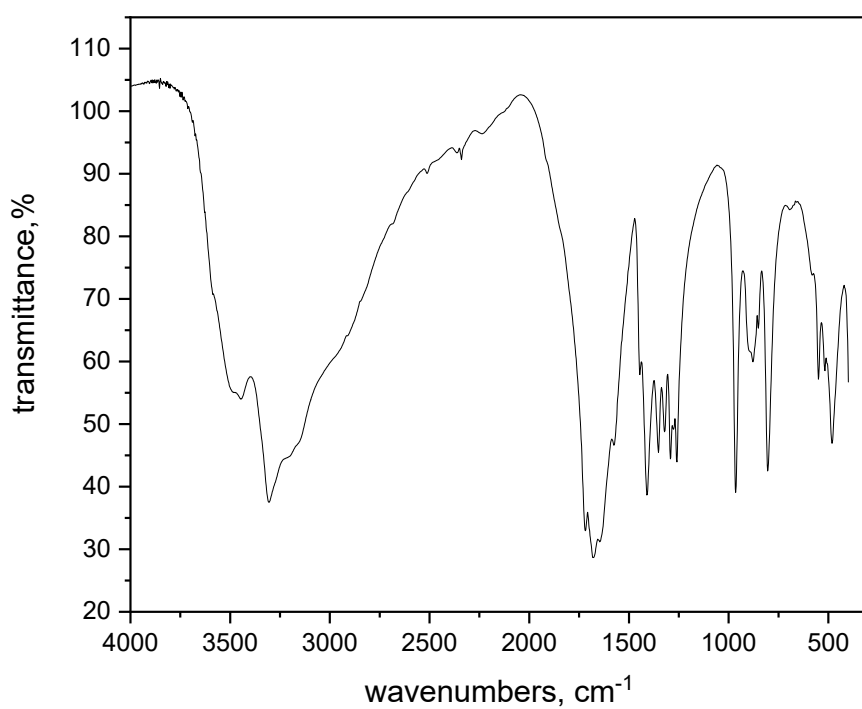

Figure S15. IR spectrum of  $[\text{Pt}(\text{NH}_3)_4][\text{VO}(\text{H}_2\text{O})(\text{C}_2\text{O}_4)_2] \cdot 2\text{H}_2\text{O}(\text{III})$ .

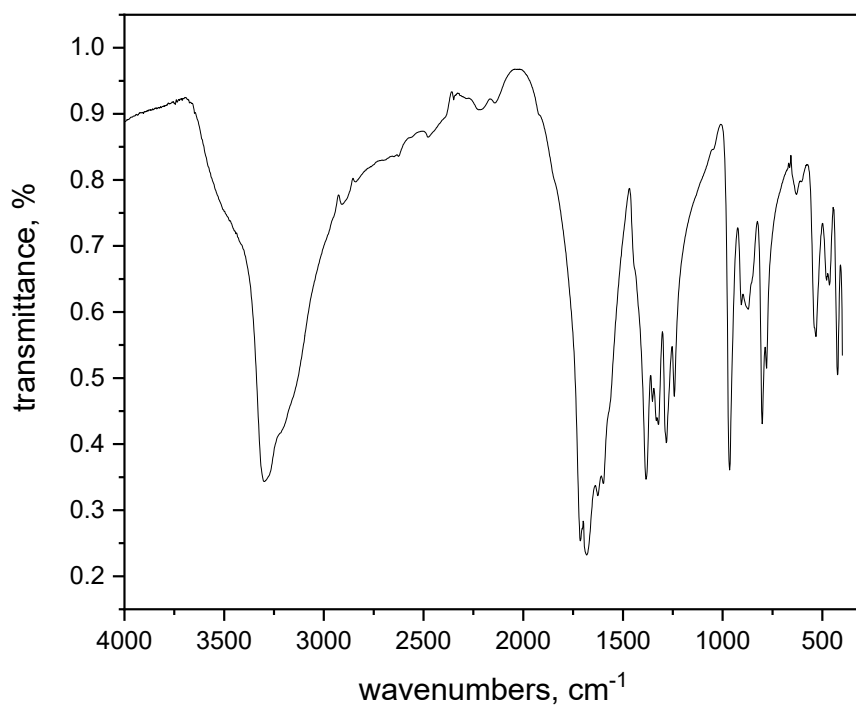

Figure S16. IR spectrum of  $\{[\text{Pt}(\text{NH}_3)_4][\text{VO}(\text{C}_2\text{O}_4)_2]\}_n(\text{IV})$ .

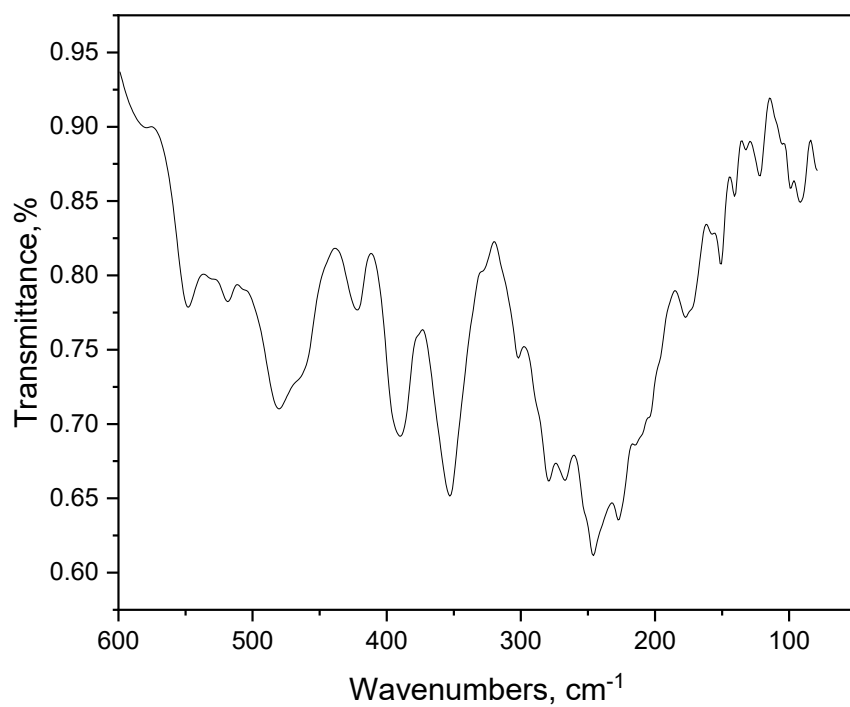

Figure S17. IR spectrum of  $[\text{Pt}(\text{NH}_3)_4][\text{VO}(\text{H}_2\text{O})(\text{C}_2\text{O}_4)_2] \cdot 2\text{H}_2\text{O}(\text{III})$ .

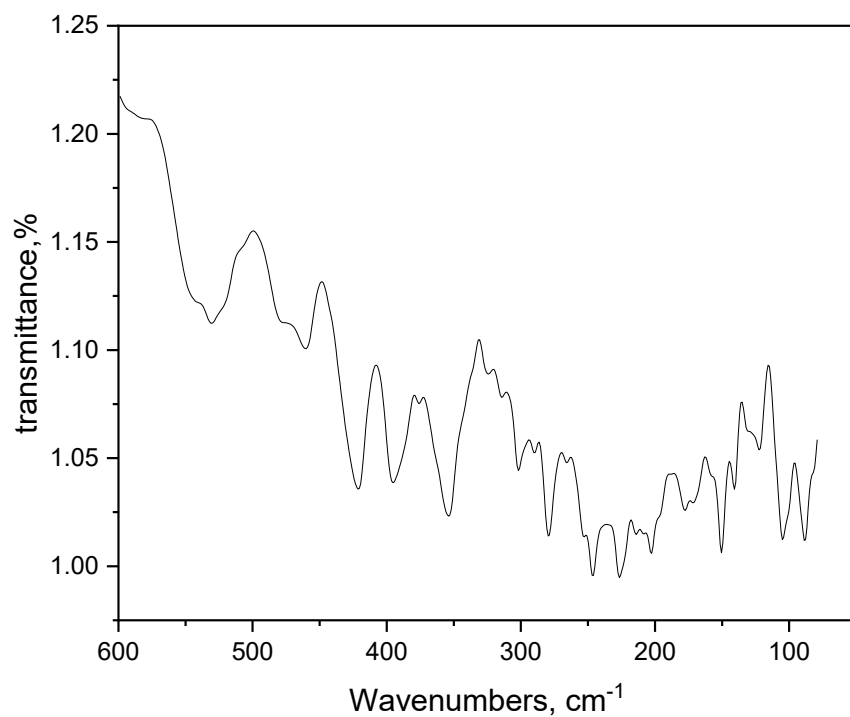

Figure S18. IR spectrum of  $\{[\text{Pt}(\text{NH}_3)_4][\text{VO}(\text{C}_2\text{O}_4)_2]\}_n(\text{IV})$ .

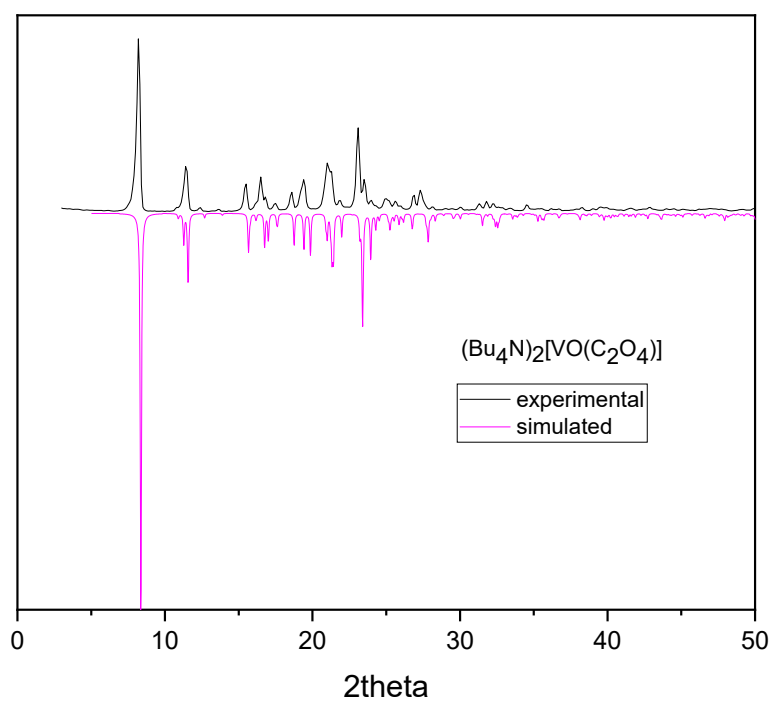

Figure S19. X-ray powder diffraction pattern of  $(\text{Bu}_4\text{N})_2[\text{VO}(\text{C}_2\text{O}_4)_2](\text{I})$ .

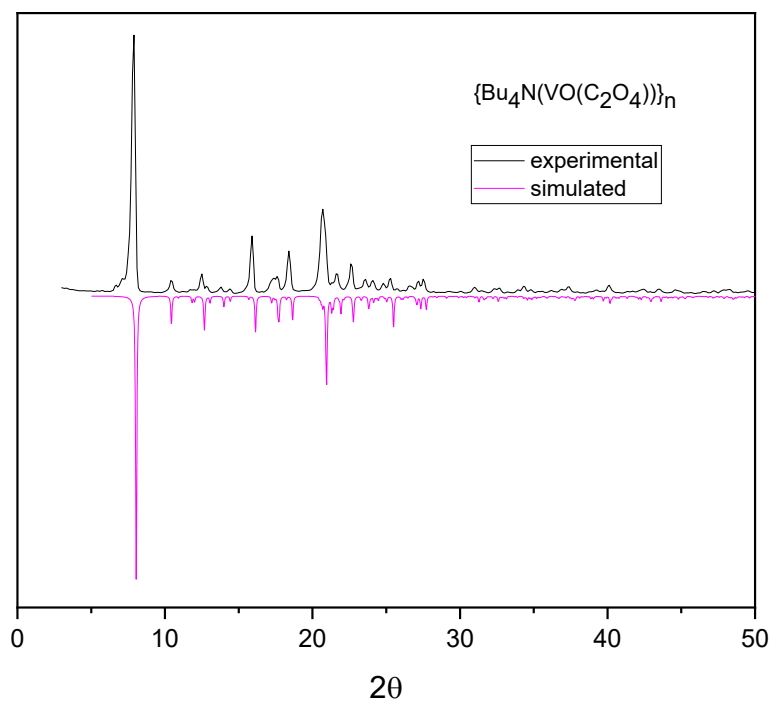

Figure S20. X-ray powder diffraction pattern of  $\{(\text{Bu}_4\text{N})(\text{VO}_2(\text{C}_2\text{O}_4))\}_n(\text{II})$ .

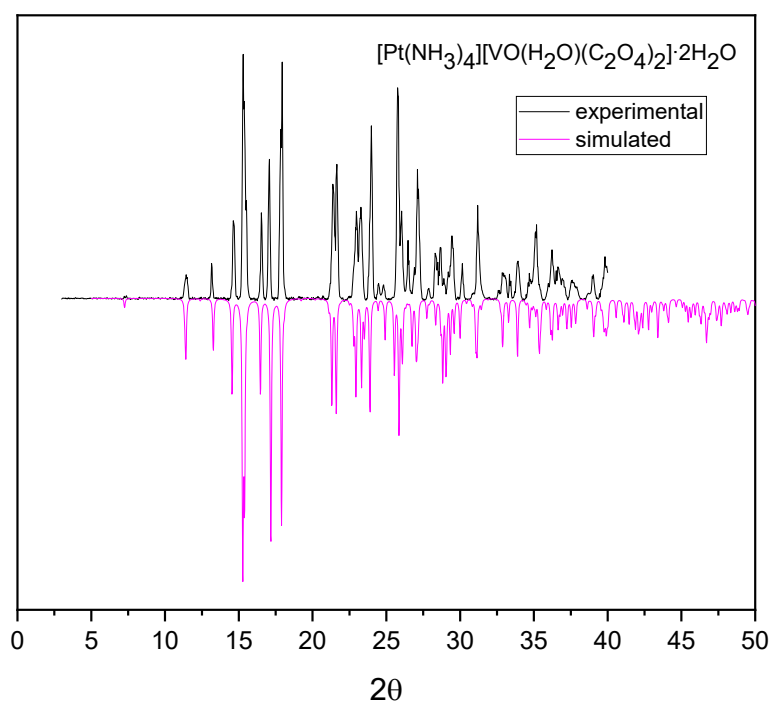

Figure S21. X-ray powder diffraction pattern of  $[\text{Pt}(\text{NH}_3)_4][\text{VO}(\text{H}_2\text{O})(\text{C}_2\text{O}_4)_2] \cdot 2\text{H}_2\text{O}$  (III).

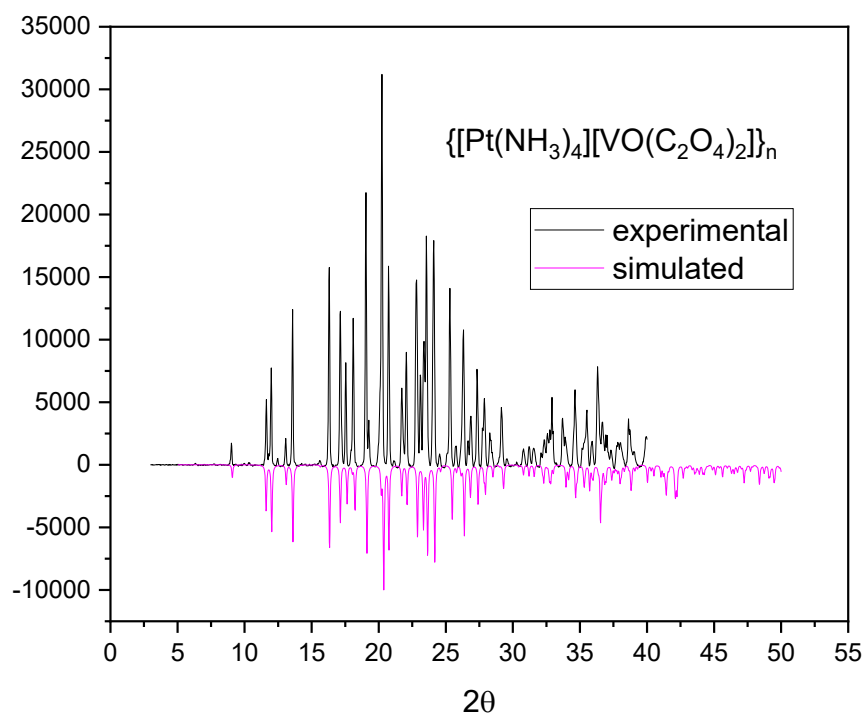

Figure S22. X-ray powder diffraction pattern of  $\{[\text{Pt}(\text{NH}_3)_4][\text{VO}(\text{C}_2\text{O}_4)_2]\}_n$  (IV).

# EPR

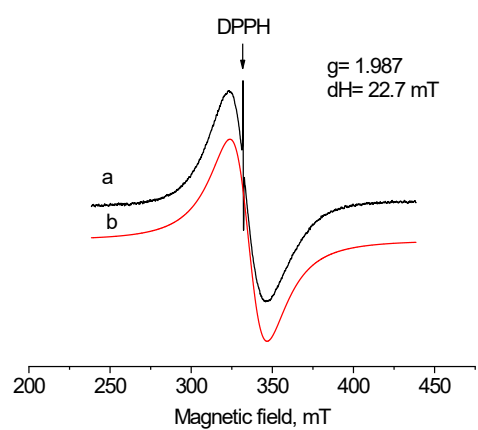

Figure S23. EPR spectra of  $\{[\text{Pt}(\text{NH}_3)_4][\text{VO}(\text{C}_2\text{O}_4)_2]\}_n$  (IV): a- experimental, b- simulated.

TG

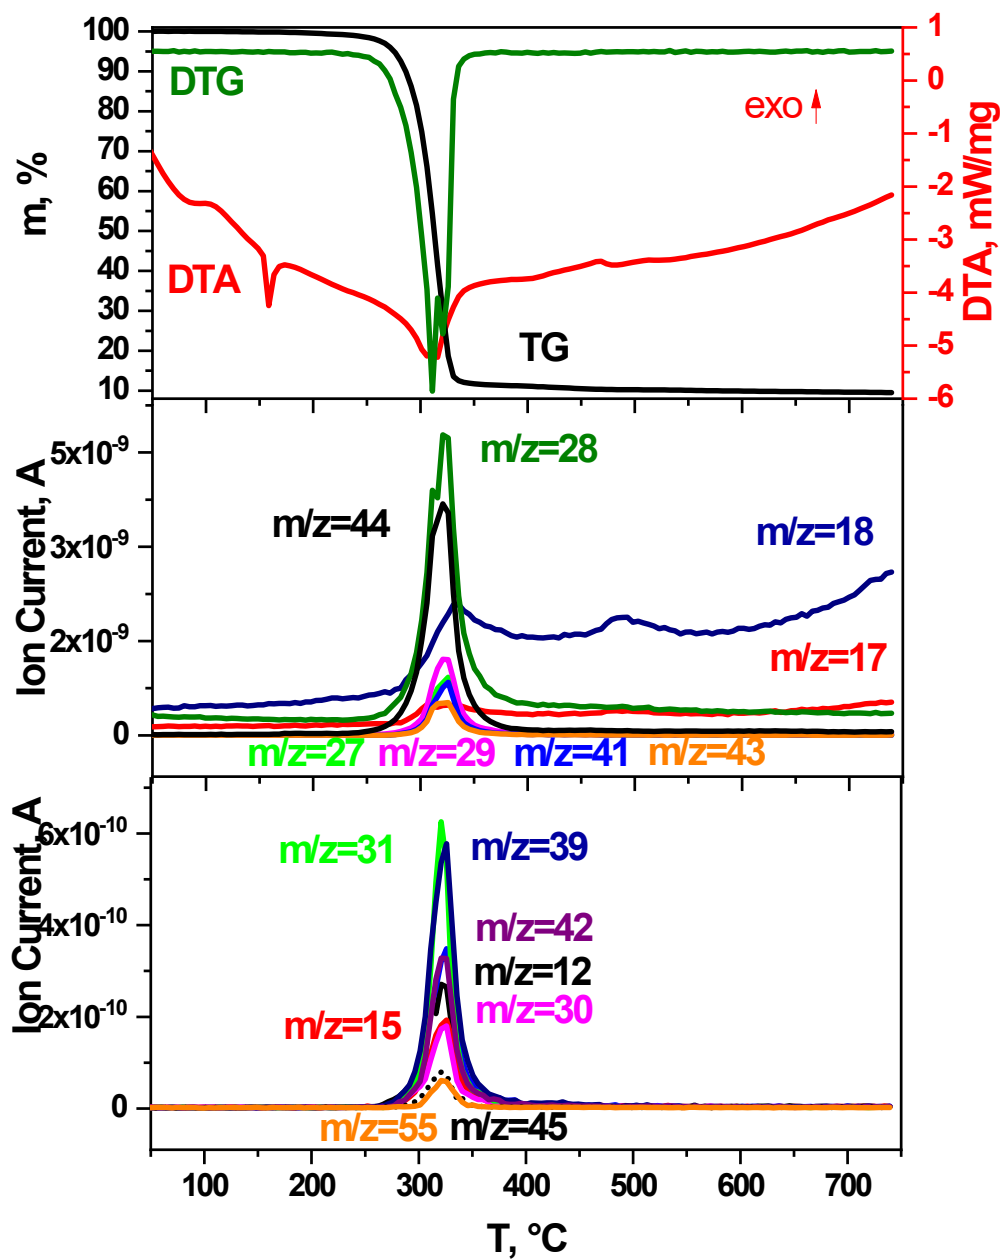

Figure S24. TG curves of  $(\text{Bu}_4\text{N})_2[\text{VO}(\text{C}_2\text{O}_4)_2](\text{I})$  obtained in reducing atmosphere at a heating rate of 10 deg/min.

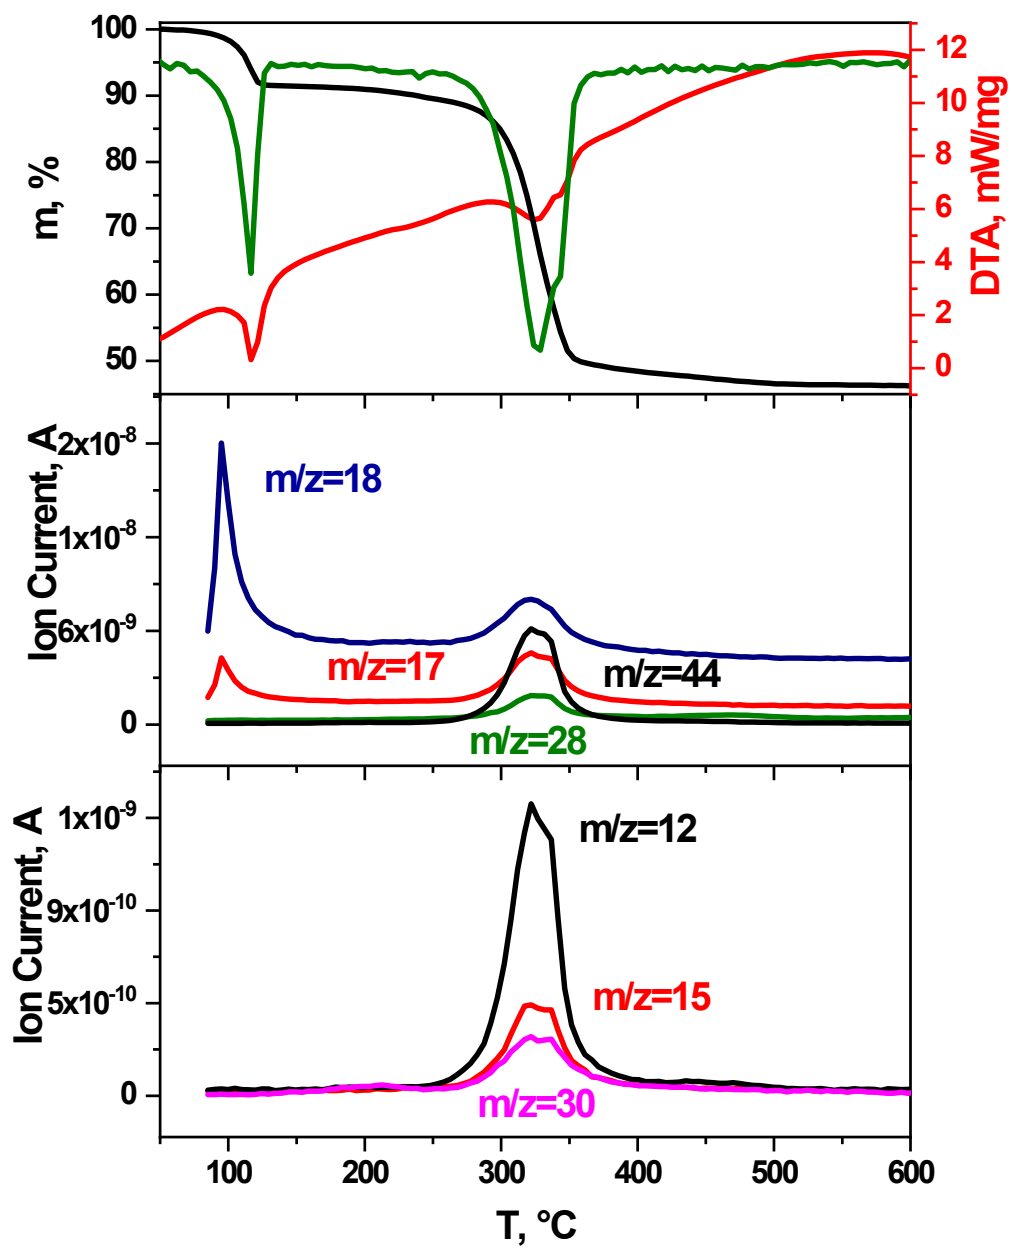

Figure S25. TG curves of  $[\text{Pt}(\text{NH}_3)_4][\text{VO}(\text{H}_2\text{O})(\text{C}_2\text{O}_4)_2] \cdot 2\text{H}_2\text{O}(\text{III})$  obtained in inert (He) atmosphere at a heating rate of 10 deg/min.

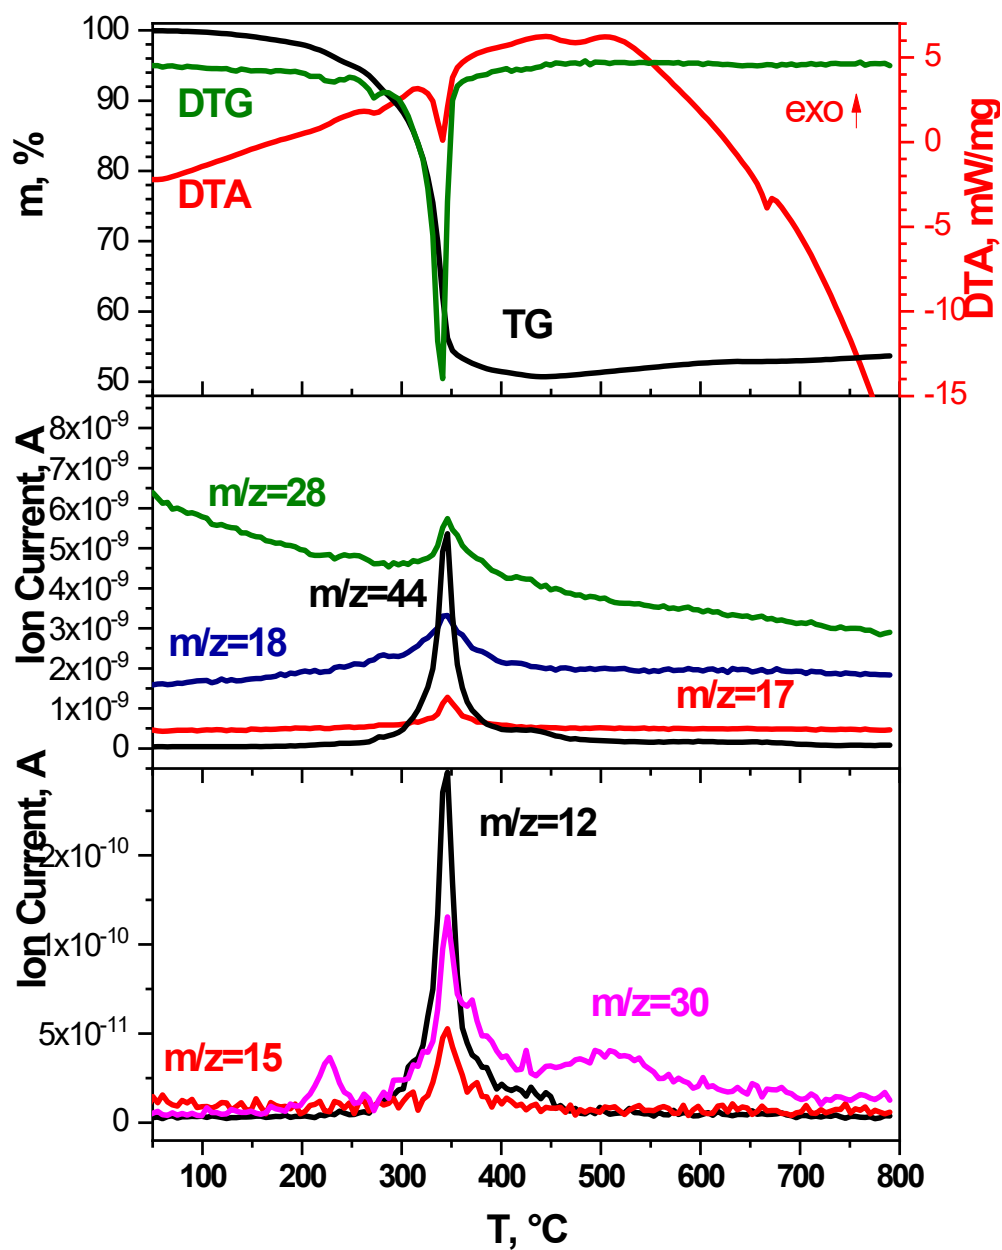

Figure S26. TG curves of  $\{[\text{Pt}(\text{NH}_3)_4][\text{VO}(\text{C}_2\text{O}_4)_2]\}_n$  (IV) obtained in inert atmosphere at a heating rate of 10 deg/min.



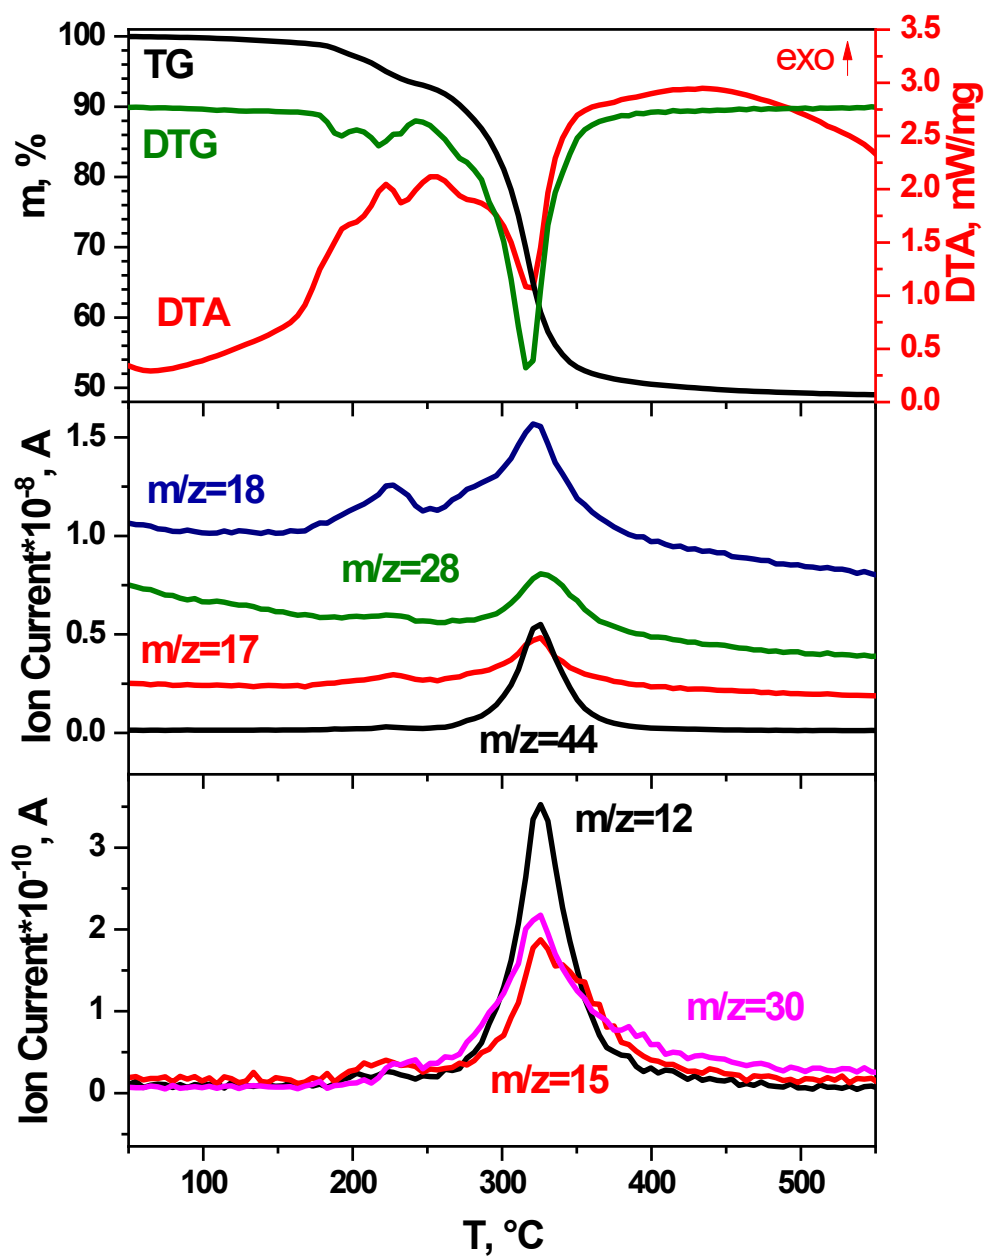

Figure S27. TG curves of of  $\{[\text{Pt}(\text{NH}_3)_4][\text{VO}(\text{C}_2\text{O}_4)_2]\}_n$  (IV) obtained in reducing atmosphere at a heating rate of 10 deg/min.

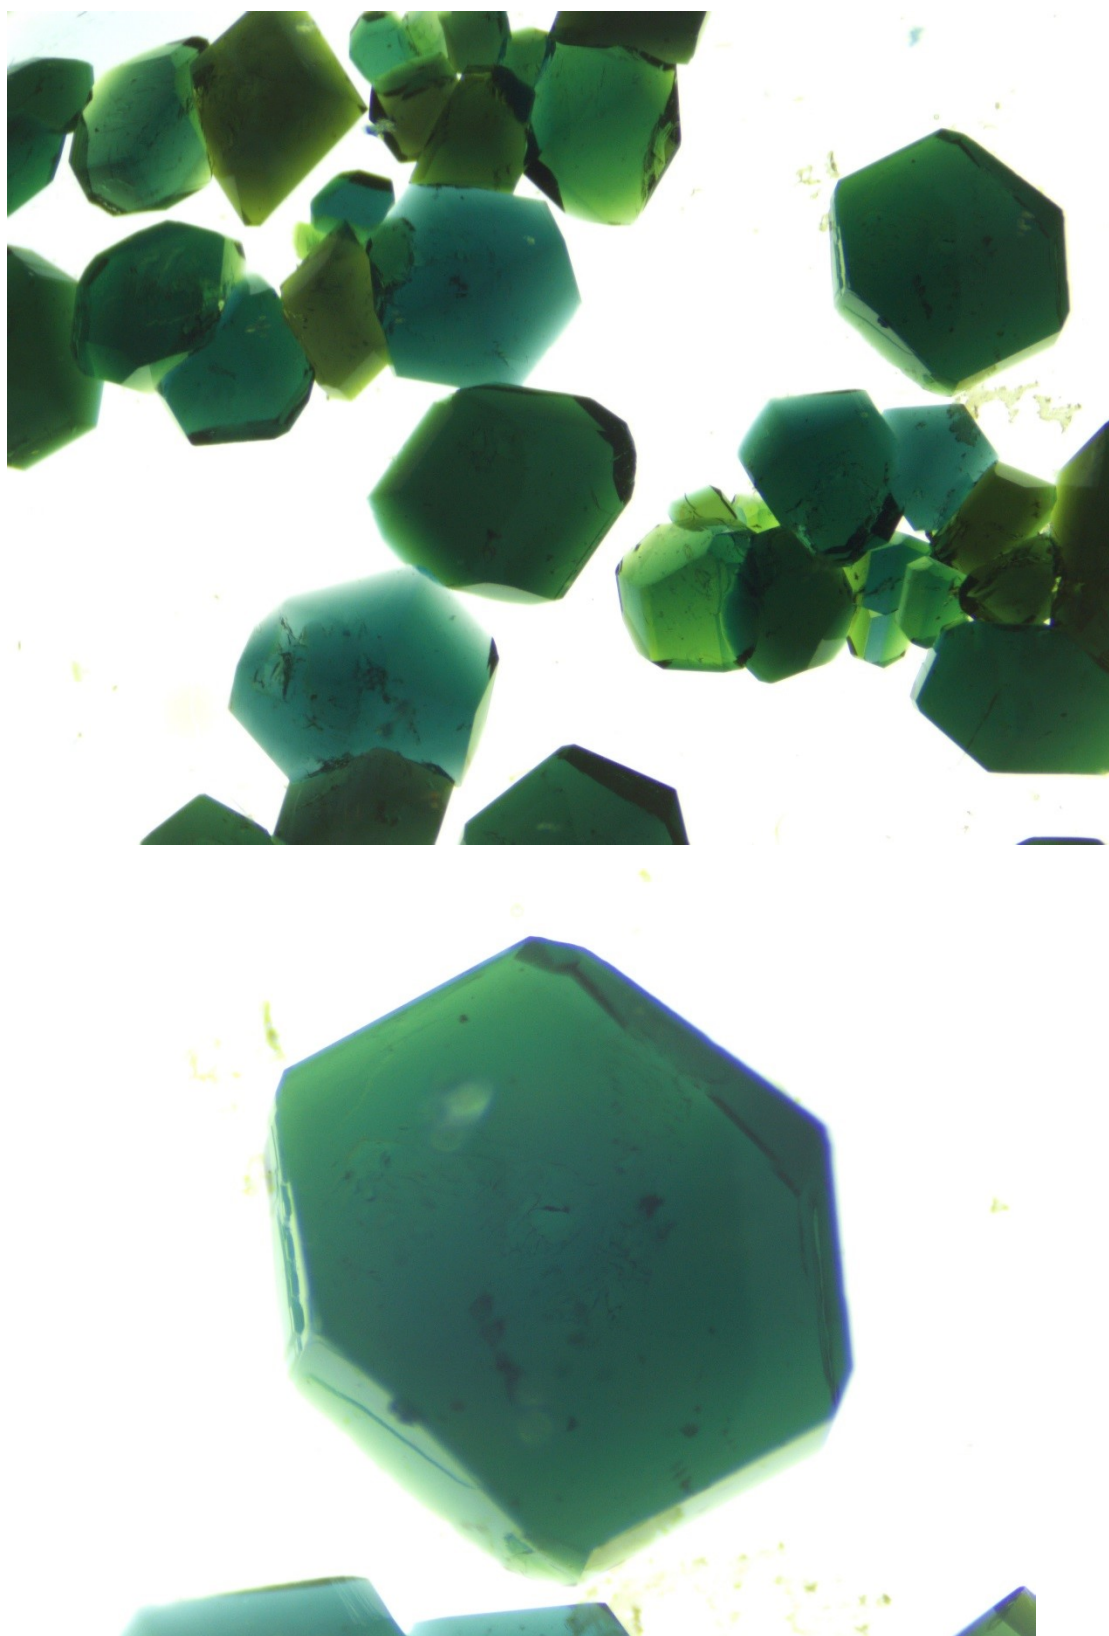

Figure S28. Microscope image of  $(\text{Bu}_4\text{N})_2[\text{VO}(\text{C}_2\text{O}_4)_2](\text{I})$ .

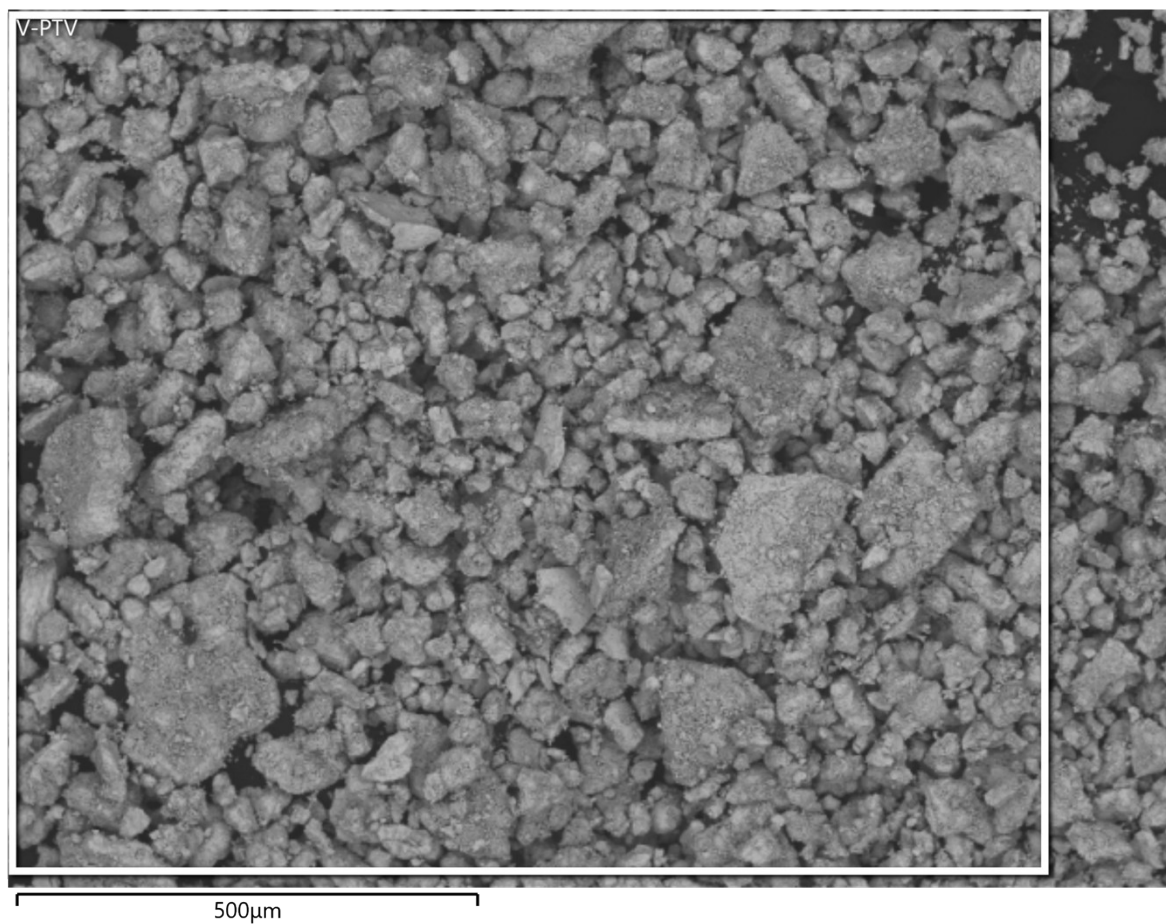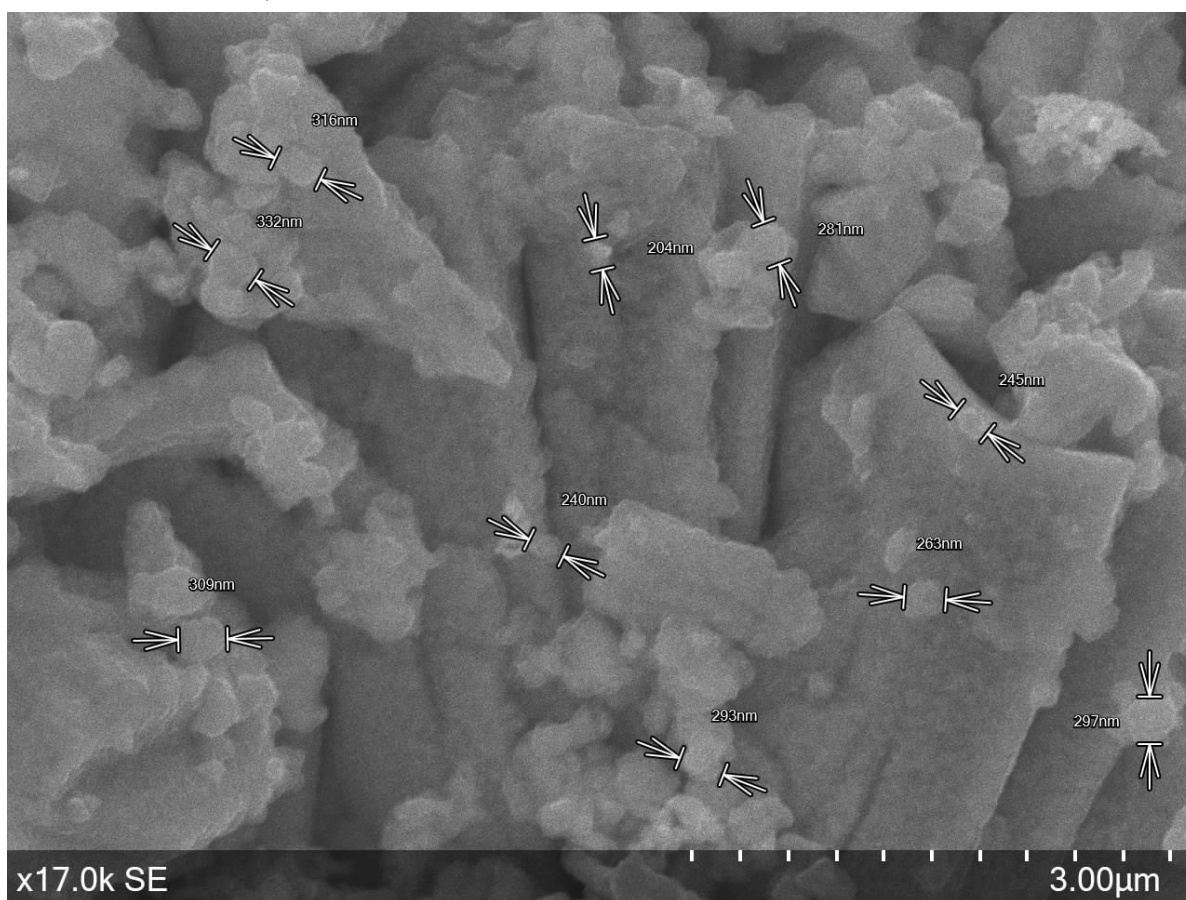

Figure S29. SEM pictures of IV thermolysis product at 700°C for 1 hour at two different scales.
